# Supplementary material
Source: publisher site journal article supplement (https://www.spandidos-publications.com/3427/downloadSupplementary)
Supplement: Supplementary file 2 [file downloadSupplementary]

## Sheet: Sheet1
Table SI. Different miRNAs in the three datasets. miR/miRNA, microRNA.
ID	adj.P.Val	P.Value	logFC	miRNA_ID		P.value
hsa-miR-425-5p	0.583312	0.0121	2.1	hsa-miR-425-5p		1.21×10^-2
hsa-miR-7-5p	0.583312	0.0121	2.6	hsa-miR-7-5p		1.21×10^-2
hsa-miR-200a-3p	0.583312	0.0126	-3.91	hsa-miR-200a-3p		1.26×10^-2
hsa-miR-6756-5p	0.583312	0.0127	-0.384	hsa-miR-6756-5p		1.27×10^-2
hsa-let-7a-5p	0.583312	0.0127	-0.718	hsa-let-7a-5p		1.27×10^-2
hsa-miR-6793-5p	0.583455	0.0129	-3.53	hsa-miR-6793-5p		1.29×10^-2
hsa-miR-339-3p	0.599413	0.0135	2.02	hsa-miR-339-3p		1.35×10^-2
hsa-miR-3616-3p	0.609289	0.0141	-2.93	hsa-miR-3616-3p		1.41×10^-2
hsa-miR-4324	0.609289	0.0144	-2.69	hsa-miR-4324		1.44×10^-2
hsa-miR-150-5p	0.609289	0.0145	-1.43	hsa-miR-150-5p		1.45×10^-2
hsa-miR-122-3p	0.609289	0.0156	-0.932	hsa-miR-122-3p		1.56×10^-2
hsa-miR-660-5p	0.609289	0.0158	1.48	hsa-miR-660-5p		1.58×10^-2
hsa-miR-6794-5p	0.609289	0.0158	-0.689	hsa-miR-6794-5p		1.58×10^-2
hsa-miR-557	0.609289	0.0159	-3.3	hsa-miR-557		1.59×10^-2
hsa-miR-3135b	0.609289	0.0159	-0.833	hsa-miR-3135b		1.59×10^-2
hsa-miR-196b-5p	0.610718	0.0162	2.8	hsa-miR-196b-5p		1.62×10^-2
hsa-miR-34a-3p	0.639578	0.0172	2.46	hsa-miR-34a-3p		1.72×10^-2
hsa-let-7b-5p	0.659251	0.018	-1.06	hsa-let-7b-5p		1.8×10^-2
hsa-miR-6821-5p	0.72524	0.0203	0.958	hsa-miR-6821-5p		2.03×10^-2
hsa-miR-4442	0.72524	0.0203	-0.403	hsa-miR-4442		2.03×10^-2
hsa-miR-30e-3p	0.72524	0.0206	-1	hsa-miR-30e-3p		2.06×10^-2
hsa-miR-6769b-5p	0.764021	0.0222	-2.86	hsa-miR-6769b-5p		2.22×10^-2
hsa-miR-4466	0.764021	0.0226	0.918	hsa-miR-4466		2.26×10^-2
hsa-miR-5100	0.764021	0.023	-0.708	hsa-miR-5100		2.3×10^-2
hsa-miR-7152-5p	0.764021	0.0234	-3.1	hsa-miR-7152-5p		2.34×10^-2
hsa-miR-6516-3p	0.764021	0.0239	2.55	hsa-miR-6516-3p		2.39×10^-2
hsa-miR-1227-5p	0.764021	0.0241	-0.702	hsa-miR-1227-5p		2.41×10^-2
hsa-miR-572	0.764021	0.0243	-0.567	hsa-miR-572		2.43×10^-2
hsa-miR-1-3p	0.764021	0.0245	-2.32	hsa-miR-1-3p		2.45×10^-2
hsa-miR-6728-5p	0.764021	0.0245	0.769	hsa-miR-6728-5p		2.45×10^-2
hsa-miR-146a-5p	0.764021	0.0248	-1.45	hsa-miR-146a-5p		2.48×10^-2
hsa-miR-134-5p	0.764021	0.025	0.924	hsa-miR-134-5p		2.5×10^-2
hsa-miR-500a-3p	0.77082	0.0257	2.8	hsa-miR-500a-3p		2.57×10^-2
hsa-miR-378i	0.77082	0.0262	-1.25	hsa-miR-378i		2.62×10^-2
hsa-miR-21-5p	0.77082	0.0276	0.806	hsa-miR-21-5p		2.76×10^-2
hsa-miR-100-5p	0.77082	0.0279	-1.3	hsa-miR-100-5p		2.79×10^-2
hsa-miR-101-3p	0.77082	0.0282	-0.941	hsa-miR-101-3p		2.82×10^-2
hsa-miR-4651	0.77082	0.0291	2.68	hsa-miR-4651		2.91×10^-2
hsa-let-7e-5p	0.77082	0.031	-0.908	hsa-let-7e-5p		3.1×10^-2
hsa-miR-378a-3p	0.77082	0.0311	-1.2	hsa-miR-378a-3p		3.11×10^-2
hsa-miR-6850-5p	0.77082	0.0323	0.582	hsa-miR-6850-5p		3.23×10^-2
hsa-miR-5196-5p	0.77082	0.0337	-3.37	hsa-miR-5196-5p		3.37×10^-2
hsa-miR-4739	0.77082	0.0337	0.947	hsa-miR-4739		3.37×10^-2
hsa-miR-122-5p	0.77082	0.0341	-0.527	hsa-miR-122-5p		3.41×10^-2
hsa-miR-502-3p	0.77082	0.0341	2.9	hsa-miR-502-3p		3.41×10^-2
hsa-miR-5739	0.77082	0.0343	-0.585	hsa-miR-5739		3.43×10^-2
hsa-miR-4284	0.77082	0.0344	0.58	hsa-miR-4284		3.44×10^-2
hsa-miR-185-5p	0.77082	0.0347	0.649	hsa-miR-185-5p		3.47×10^-2
